# Supplementary material
Source: PubMed Central journal article supplement (PMC7713704)
Supplement: NIHMS1647019-supplement-Supplementary_Information.pdf [file NIHMS1647019-supplement-Supplementary_Information.pdf]

## SUPPLEMENTARY INFORMATION

### Acoustic Biosensors for Ultrasound Imaging of Enzyme Activity

Anupama Lakshmanan, Zhiyang Jin, Suchita P. Nety, Daniel P. Sawyer, Audrey Lee-Gosselin, Dina Malounda, Margaret B. Swift, David Maresca and Mikhail G. Shapiro.

Correspondence to: mikhail@caltech.edu

## CONTENTS

Supplementary Table 1

References for Supplementary Information

| Plasmid Name                    | Description and Purpose                                               | Transcriptional regulators | Output gene product(s)                    | Insertions/Tags (including linkers)                              | Reference Information |
|---------------------------------|-----------------------------------------------------------------------|----------------------------|-------------------------------------------|------------------------------------------------------------------|-----------------------|
| WT C-His Ana GvpC in pET28a     | Ana <i>gvpC</i> used as wild-type control for TEV and calpain sensor  | pT7, LacO                  | WT C-His Ana GvpC                         | SLE-His6 at C-terminus                                           | Addgene ID# 85732     |
| WT N-His Ana GvpC in pET28a     | Ana <i>gvpC</i> used as wild-type control for ClpXP sensor            | pT7, LacO                  | WT N-His-Ana-GvpC                         | G-His6-SG at N-terminus                                          | Addgene ID# 153294    |
| C-His-GvpC-TEV                  | Ana <i>gvpC</i> with TEV cleavage site                                | pT7, LacO                  | C-His Ana GvpC with TEV cleavage site     | SLE-His6 at C-terminus, GSGSGS-ENLYFQG-SGSGSG in GvpC repeat 2   | Addgene ID# 153296    |
| C-His-GvpC-Calpain              | Ana <i>gvpC</i> with calpain cleavage site                            | pT7, LacO                  | C-His Ana GvpC with calpain cleavage site | SLE-His6 at C-terminus, GSGSG-QQEVYGMMPRD-GSGSG in GvpC repeat 2 | Addgene ID# 153295    |
| N-His-GvpC-ssrA                 | Ana <i>gvpC</i> with ssrA degradation tag                             | pT7, LacO                  | N-His Ana GvpC with ssrA degradation tag  | G-His6-SG at N-terminus, SG-AANDENYALAA at C-terminus            | Addgene ID# 153297    |
| pBEST_OR2_OR1-Pr-UTR1_ClpP-T500 | <i>clpP</i> plasmid for use in the cell-free TX-TL system             | OR2-OR1-Pr                 | ClpP                                      |                                                                  | Addgene ID# 153302    |
| pACYC-FLAG-dN6-His              | <i>clpX</i> plasmid for use in the cell-free TX-TL system             | pT7, LacO                  | Flag-ClpXdeltaNLinkedHexamer-His6         | Flag tag at N-terminus His6 at C-terminus L20 linkers            | Addgene ID# 22143     |
| pET28a_T5-ARG1                  | Original acoustic reporter gene construct ( <i>ARG<sub>wT</sub></i> ) | pT5, LacO                  | Ana GvpA, WT Ana GvpC, Mega GvpR-U        |                                                                  | Addgene ID # 106476   |

|                              |                                                                           |                     |                              |                              |                           |
|------------------------------|---------------------------------------------------------------------------|---------------------|------------------------------|------------------------------|---------------------------|
| pET28a-T5-ASG_ClpXP          | Acoustic sensor gene for ClpXP ( <i>ASG<sub>clpXP</sub></i> )             | pT5, LacO           | Ana GvpA, dGvpC, Mega GvpR-U | SG-AANDENYALAA at C-terminus | Addgene ID# 153299        |
| pKD3                         | Frt-flanked cat cassette for recombineering                               |                     | CAT                          |                              | Addgene ID # 45604        |
| pKD46                        | Plasmid that carries the Lambda Red recombineering system                 | pBAD, araBAD operon | Gam, Beta, Exo               |                              | Coli Genetic Stock Center |
| pE-FLP                       | <i>FLP</i> recombinase to remove the integration module in recombineering | pE                  | FLP                          |                              | Addgene ID # 45978        |
| araBAD-BCD20-ClpP-BCD17-ClpX | Expression of <i>clpX</i> and <i>clpP</i> under araBAD promoter           | pBAD, araBAD operon | ClpX, ClpP                   |                              | Addgene ID # 153301       |
| pTetR-BCD2-Ana GvpC          | Wild-type Ana <i>gvpC</i> under Tet promoter                              | pTet, TetO          | WT Ana GvpC                  |                              | Addgene ID # 153298       |

### Supplementary Table 1: List and features of genetic constructs used in this study.

pKD3<sup>1</sup> was a gift from Barry L. Wanner (Addgene plasmid # 45604 ; <http://n2t.net/addgene:45604> ; RRID:Addgene\_45604). pKD46<sup>1</sup> was obtained from the Coli Genetic Stock Center (CGSC, <https://cgsc.biology.yale.edu/Site.php?ID=64672>).

pE-FLP<sup>2</sup> was a gift from Drew Endy & Keith Shearwin (Addgene plasmid # 45978; <http://n2t.net/addgene:45978> ; RRID:Addgene\_45978).

The pBEST\_OR2-OR1-Pr-UTR1\_ClpP-T500 was a gift from Zachary Sun and Richard Murray<sup>3</sup>.

pACYC-FLAG-dN6-His<sup>4</sup> was a gift from Robert Sauer (Addgene plasmid # 22143 ; <http://n2t.net/addgene:22143> ; RRID:Addgene\_22143)

The pTARA backbone was modified to make the araBAD-BCD20-ClpP-BCD17-ClpX and pTetR-BCD2-Ana GvpC constructs. pTARA<sup>5</sup> was a gift from Kathleen Matthews (Addgene plasmid # 31491; <http://n2t.net/addgene:31491> ; RRID:Addgene\_31491).

### REFERENCES FOR SUPPLEMENTARY INFORMATION:

1. Datsenko, K.A. & Wanner, B.L. One-step inactivation of chromosomal genes in *Escherichia coli* K-12 using PCR products. *Proceedings of the National Academy of Sciences* **97**, 6640-6645 (2000).
2. St-Pierre, F. et al. One-step cloning and chromosomal integration of DNA. *ACS Synthetic Biology* **2**, 537-541 (2013).
3. Zachary, Z.S., Jongmin, K., Vipul, S. & Richard, M.M. Protein degradation in a TX-TL cell-free expression system using ClpXP protease. *bioRxiv* (2015).
4. Martin, A., Baker, T.A. & Sauer, R.T. Rebuilt AAA + motors reveal operating principles for ATP-fuelled machines. *Nature* **437**, 1115-1120 (2005).
5. Wycuff, D.R. & Matthews, K.S. Generation of an AraC-araBAD promoter-regulated T7 expression system. *Analytical Biochemistry* **277**, 67-73 (2000).
